# Supplementary material for: A Multiplex PCR/LDR Assay for the Simultaneous Identification of Category A Infectious Pathogens: Agents of Viral Hemorrhagic Fever and Variola Virus
Source: PubMed Central journal article supplement (PMC4575071; doi:10.1371/journal.pone.0138484), 2015-09-18
Supplement: pone.0138484.s002.pdf [file pone.0138484.s002.pdf]

## Amplicon 1

Allele specific upstream primer  
5' **TTGAGAAGGTTCAAAGGCCAAATTC AAGTA** downstream primer  
**CATGCAGAGCAAGGACTGATACAATATCCAACA** 3'

KJ660348 -----976 TTGAGAAGGTTCAAAGGCCAAATTC AAGTACATGCAGAGCAAGGACTGATACAATATCCAACA 1037-----  
KM233116 -----946 TTGAGAAGGTTCAAAGGCCAAATTC AAGTACATGCAGAGCAAGGACTGATACAATATCCAACA 1008-----  
KC242801 -----976 TTGAGAAGGTTCAAAGGCCAAATTC AAGTACATGCAGAGCAAGGACTGATACAATATCCAACA 1037-----

Allele specific upstream primer  
5' **CAAGGGATGCACATGGTTGTC** downstream primer  
**GGGCATGATGCCAACGAYGCTGT** 3'

KJ660348 -----1118 CAAGGGATGCACATGGTTGTC **CGG**ACATGATGCCAACGATGCTGT 1162-----  
KM233116 -----1088 CAAGGGATGCACATGGTTGTC **CGG**ACATGATGCCAACGATGCTGT 1132-----  
KC242801 -----1118 CAAGGGATGCACATGGTTGTC **CGG**CATGATGCCAACGATGCTGT 1162-----

Allele specific upstream primer  
**GAGGTGAACTCCTTTAAGGCTGCACT** downstream primer  
**AGCTCCCTGGCCAAGCATGGAGAGTAT**

KJ660348 -----1295 GAGGTGAACTCCTT**CA**AGGCTGCACT **CA**GCTCCCTGGCCAAGCATGGAGAGTAT 1348-----  
KM233116 -----1265 GAGGTGAACTCCTT**CA**AGGCTGCACT **CA**GCTCCCTGGCCAAGCATGGAGAGTAT 1318-----  
KC242801 -----1295 GAGGTGAACTCCTTTAAGGCTGCACT **CA**GCTCCCTGGCCAAGCATGGAGAGTAT 1348-----

## Amplicon 2

Allele specific upstream primer  
5' **TTGCATTTAGATATGAGTTTACAGCACCTTTTATA** downstream primer  
**GAATATTGCAACCGTTGCTATGGTGTTAAGAATGT** 3'

KJ660346 ---13492 TTGCATTTAGGTATGAGTTTACAGCACCTTTTATA **A**GAATATTGCAACCGTTGCTATGGTGTTAAGAATGT 13562---  
KM233116 ---13462 TTGCATTTAGGTATGAGTTTACAGCACCTTTTATA **A**GAATATTGCAACCGTTGCTATGGTGTTAAGAATGT 13532---  
KC242801 ---13492 TTGCATTTAGATATGAGTTTACAGCACCTTTTATA **A**GAATATTGCAACCGTTGCTATGGTGTTAAGAATGT 13562---

Allele specific upstream primer  
5' **CATTATACAATCCCACAGTGTATATGCATGTC** downstream primer  
**AGTGATTATTATAATCCACCACATAACCTCACACTGGT** 3'

KJ660346 --- 13575 CATTATACAATCCCACAGTGTATATGCATGTC **CA**GTGATTATTATAATCCACC**G**CATAACCTCACACTGG 13645---  
KM233116 ----13545 CATTATACAATCCCACAGTGTATATGCATGTC **CA**GTGATTATTATAATCCACC**G**CATAACCTCACACTGG 13615---  
KC242801 ---- 13576 CATTATACAATCCCACAGTGTATATGCATGTC **CA**GTGATTATTATAATCCACCACATAACCTCACACTGG 13645---

Allele specific upstream primer  
5' **GGGCCTAGTTCATACAGGGGTCATATG** downstream primer  
**GGAGGGATTGAAGGACTGCAACAAAACTCT** 3'

KJ660346 ---- 13670 GGGCCTAGTTCATACAGGGGTCATAT **G**GGAGGGATTGAAGGACTGCAACAAAACTCT 13728---  
KM233116 ---- 13639 GGGCCTAGTTCATACAGGGGTCATAT **G**GGAGGGATTGAAGGACTGCAACAAAACTCT 13697----  
KC242801 -----13670 GGGCCTAGTTCATACAGGGGTCATAT **G**GGAGGGATTGAAGGACTGCAACAAAACTCT 13728---
