# Supplementary material for: A Multiplex PCR/LDR Assay for the Simultaneous Identification of Category A Infectious Pathogens: Agents of Viral Hemorrhagic Fever and Variola Virus
Source: PubMed Central journal article supplement (PMC4575071; doi:10.1371/journal.pone.0138484), 2015-09-18
Supplement: pone.0138484.s003.pdf [file pone.0138484.s003.pdf]

| Organism   | PCR primer        | Sequence (5' to 3')                                                    | Gene       | Amplicon Size |
|------------|-------------------|------------------------------------------------------------------------|------------|---------------|
| FILO AMP1  | ESRZ-A1-PCR-F9    | <u>GCC AAC TAC CGC AAC ACC</u> CKG AAG AGG AGA CWA CTG AAG CWA ATG C   | NP         | 488-599       |
|            | ERZ-A1-PCR- R9a   | <u>CCA ACT ACC GCA ACC ACC</u> AAC ATT WAC TCC TGC RAG GGT RC          |            |               |
|            | ES-A1-PCR-R9b     | <u>CCA ACT ACC GCA ACC ACC</u> TAC ATT AAC ACC AGC CAG CGT GC          |            |               |
|            | M-A1-PCR-F11      | <u>GCC AAC TAC CGC AAC ACA</u> TAC ATG CAA TAC TTG AAC CCY CCT C       |            |               |
|            | M-A1-PCR-R11      | <u>CCA ACT ACC GCA ACC AGC</u> ATR GTG TTC CCA ATT AAT TTG TYC         |            |               |
| FILO AMP2  | ESRZ-A2-PCR-F10   | <u>GCC AAC TAC CGC AAC ACA</u> TCM TGG CAC CAY ACM AGT GAT GAT T       | L          | 399-531       |
|            | ERZ-A2-PCR-R10a   | <u>CCA ACT ACC GCA ACC A</u> AGT CWC CCA TCA CMG CTG AKC GTA AC        |            |               |
|            | ES-A2-PCR-R10b    | <u>CCA ACT ACC GCA ACC AGA</u> GGA ATA TCC CAC AGG CAC TTG TGA C       |            |               |
|            | M-A2-PCR-F12      | <u>GCC AAC TAC CGC AAC ACC</u> ATG GCA GAA TTA TCA ACG CGT TAC         |            |               |
|            | M-A2-PCR-R12      | <u>CCA ACT ACC GCA ACC ACT</u> KGG TTT TCC GTG GTC ATT TAC AAC         |            |               |
| RVF AMP1   | RVFM-A1-PCR-F     | <u>GCC AAC TAC CGC AAC ACT</u> TTT GTA GGC AGA TGA CAG GTG C           | M          | 599           |
|            | RVFM-A1-PCR-R     | <u>CCA ACT ACC GCA ACC ACA</u> YGT TGT GCA AGG CTC AAC TC              |            |               |
| RVF AMP2   | RVFS-A2-PCR-F     | <u>GCC AAC TAC CGC AAC ACG</u> GGC CCT GTT GTG TCT TTC TC              | S          | 439           |
|            | RVFS-A2-PCR- R    | <u>CCA ACT ACC GCA ACC ACC</u> TGG YRA CAG GCA CAG GTC                 |            |               |
| CCHF AMP1  | CCHF-A1-PCR-F13   | <u>GCC AAC TAC CGC AAC ACG</u> GAC TTG TGG ACA CYT TCA CAA AC          | S          | 446           |
|            | CCHF-A1-PCR-F15   | <u>GCC AAC TAC CGC AAC ACC</u> TTG TGG ACA CYT TYA CAA AYT C           |            |               |
|            | CCHF-A1-PCR-R13   | <u>CCA ACT ACC GCA ACC AGC</u> AAG GCC TGT WGC RAC AAG TGC TAT         |            |               |
|            | CCHF-A1-PCR-R15   | <u>CCA ACT ACC GCA ACC AAT</u> CAT RTC TGA HAR CAT CTC TTT GAC         |            |               |
| CCHF AMP2  | CCHF-A2-PCR-F14   | <u>GCC AAC TAC CGC AAC ACG</u> YAG AAT CAG TGA RAT GGG WGT CTG C       | S          | 532           |
|            | CCHF-A2-PCR-F16   | <u>GCC AAC TAC CGC AAC ACG</u> WGC ACA RGG TGC ACA GAT TGA YAC         |            |               |
|            | CCHF-A2-PCR-R14   | <u>CCA ACT ACC GCA ACC ATC</u> TCA AAG ATA YCG TTG CCG CAC             |            |               |
|            | CCHF-A2-PCR-R16   | <u>CCA ACT ACC GCA ACC ATT</u> VCC YTT GAC GTT GTA RGC ATT             |            |               |
| Lassa AMP1 | LassaL-A1-PCR-F1a | <u>GCC AAC TAC CGC AAC ACC</u> CTA AWG TCC TRC TTG TTG CAA C           | L          | 628           |
|            | LassaL-A1-PCR-F1b | <u>GCC AAC TAC CGC AAC ACC</u> CCA AYG TYC TTG TWG TCG CAA C           |            |               |
|            | LassaL-A1-PCR-R1a | <u>CCA ACT ACC GCA ACC AGT</u> TCC TGG GTG TTG GGT GAA C               |            |               |
|            | LassaL-A1-PCR-R1b | <u>CCA ACT ACC GCA ACC AGT</u> GCA TGG GTC TTR GGR GAA C               |            |               |
| Lassa AMP2 | LassaL-A2-PCR-F2a | <u>GCC AAC TAC CGC AAC ACC</u> GRA CAC ATT TRC TAC CCA RTG TTC TRC     | L          | 487           |
|            | LassaL-A2-PCR-F2b | <u>GCC AAC TAC CGC AAC ACC</u> GRA CAC ATT TRC TAC CTA RTG TCT TGC     |            |               |
|            | LassaL-A2-PCR-R2a | <u>CCA ACT ACC GCA ACC ATG</u> AYA CWA TCA TTG ATC AGT CAG TGG C       |            |               |
|            | LassaL-A2-PCR-R2b | <u>CCA ACT ACC GCA ACC ATG</u> AYA CAA TCA TTG ATC AGT CRG TTG C       |            |               |
| VAR/VAC    | VV-A1-PCR-F17     | <u>GCC AAC TAC CGC AAC ACG</u> AAT TGA ATC TTA GTA AGT TTA TGA TGG TTC | RNA<br>POL | 421           |
|            | VV-A1-PCR-R17     | <u>CCA ACT ACC GCA ACC ACT</u> TTA TTG TCT CCR AAC GTA GCT CTC         |            |               |
| VAR/VAC    | VV-A2-PCR-F18     | <u>GCC AAC TAC CGC AAC ACC</u> CGA TGT GTC TAC ATA AAT ATG CAA AGT C   | RNA<br>POL | 485           |
|            | VV-A2-PCR-R18     | <u>CCA ACT ACC GCA ACC AAA</u> TAT TTT CGT TAT CAA CCT TTA TAA CGT ATC |            |               |

|               |                  |                                                                       |     |     |
|---------------|------------------|-----------------------------------------------------------------------|-----|-----|
| FLAVI<br>AMP1 | DENYF-A1-PCR-F2a | <u>GCC AAC TAC CGC AAC ACC</u> MAG AAT GGC AAT GAC TGA CAC MAC        | NS5 | 416 |
|               | DENYF-A1-PCR-F2b | <u>GCC AAC TAC CGC AAC ACC</u> ACA GAT GGC AAT GAC AGA YAC RAC Y      |     |     |
|               | DENYF-A1-PCR-F2c | <u>GCC AAC TAC CGC AAC ACC</u> ACA AAT AGC YAT GAC TGA YAC YAC ACC CT |     |     |
|               | DENYF-A1-PCR-F2d | <u>GCC AAC TAC CGC AAC ACC</u> CCA GTT RGC YAT GAC AGA CAC AAC        |     |     |
|               | DENYF-A1-PCR-F2e | <u>GCC AAC TAC CGC AAC ACC</u> YCA GTT AGC YAT GAC AGA TAC AAC        |     |     |
|               | DENYF-A1-PCR-R2a | <u>CCA ACT ACC GCA ACC ACA</u> CAT GTA CCA TAT TGC RCG ACT YCC        |     |     |
|               | DENYF-A1-PCR-R2b | <u>CCA ACT ACC GCA ACC AAC</u> ATG TAC CAT ATG GCT CTG CTR CC         |     |     |
|               | DENYF-A1-PCR-R2c | <u>CCA ACT ACC GCA ACC ACC</u> ACA TAT ACC ATA TRG CYC TAC TGC C      |     |     |
|               | DENYF-A1-PCR-R2d | <u>CCA ACT ACC GCA ACC ACA</u> TRT ACC ARA TTG CYC GGC TTC C          |     |     |
|               | DENYF-A1-PCR-R2e | <u>CCA ACT ACC GCA ACC ACA</u> TRT ACC AKA TRG CAC GGC TTC C          |     |     |
| FLAVI<br>AMP2 | DENYF-A2-PCR-F1a | <u>GCC AAC TAC CGC AAC ACG</u> ATG AYA CAG CCG GAT GGG AYA C          | NS5 | 409 |
|               | DENYF-A2-PCR-F1b | <u>GCC AAC TAC CGC AAC ACG</u> ATG ACA CMG CMG GMT GGG ACA C          |     |     |
|               | DENYF-A2-PCR-F1c | <u>GCC AAC TAC CGC AAC ACG</u> AYG AYA CWG CAG GAT GGG ACA C          |     |     |
|               | DENYF-A2-PCR-F1d | <u>GCC AAC TAC CGC AAC ACG</u> AYG AYA CAG CTG GKT GGG ACA C          |     |     |
|               | DENYF-A2-PCR-F1e | <u>GCC AAC TAC CGC AAC ACG</u> AYG ACA CRG CAG GYT GGG ACA C          |     |     |
|               | DENYF-A2-PCR-F1f | <u>GCC AAC TAC CGC AAC ACG</u> ATG AYA CCG CTG GRT GGG AYA C          |     |     |
|               | DENYF-A2-PCR-R1a | <u>CCA ACT ACC GCA ACC AAC</u> RCA RTC ATC TCC RCT GAT TGC C          |     |     |
|               | DENYF-A2-PCR-R1b | <u>CCA ACT ACC GCA ACC AAC</u> RCA RTC ATC TCC ACT GAT KGC C          |     |     |
|               | DENYF-A2-PCR-R1c | <u>CCA ACT ACC GCA ACC AAC</u> RCA ATC ATC YCC GCT RAT GGC C          |     |     |
|               | DENYF-A2-PCR-R1d | <u>CCA ACT ACC GCA ACC AAC</u> RCA ATC RTC TCC ACT RAT TGC C          |     |     |
|               | DENYF-A2-PCR-R1e | <u>CCA ACT ACC GCA ACC AAC</u> RCA RTC GTC TCC ATT CAC CGC C          |     |     |
