# Supplementary material for: A Multiplex PCR/LDR Assay for the Simultaneous Identification of Category A Infectious Pathogens: Agents of Viral Hemorrhagic Fever and Variola Virus
Source: PubMed Central journal article supplement (PMC4575071; doi:10.1371/journal.pone.0138484), 2015-09-18
Supplement: pone.0138484.s004.pdf [file pone.0138484.s004.pdf]

| Upstream Primer |                                                                  | Downstream Primer |                                         |
|-----------------|------------------------------------------------------------------|-------------------|-----------------------------------------|
| Primer Name     | Sequence                                                         | Primer Name       | Sequence                                |
| ER-A1-LDR-UP1   | Blk- <u>TTGGCCTGTTCCCGCTCGCT</u><br>GAAAAAGTCCAGCGACAAATTCAGGTT  | ER-A1-LDR-DP1     | CATGCAGAACAGGGTTTAATTCAATATCCCAC        |
| ER-A1-LDR-UP2   | Blk- <u>CCTGCGCTGCGTGGTGTTC</u><br>ATCCACCAGGTATGCATATGGTAGCT    | ER-A1-LDR-DP2     | GGCCACGATGCCAATGATGCTGTC                |
| ER-A1-LDR-UP3   | Blk- <u>TCGCGGACGGTGAGCACTGC</u><br>GTTAATGCATTTAAGCCGCCCTA      | ER-A1-LDR-DP3     | AGTCACTTGCTAAGCATGGGGARTATGC            |
| ER-A2-LDR-UP4   | Blk- <u>TTCCCCTGGTGCCACTCCG</u><br>TCGCTATGAGTTCCTGCACCATTTATT   | ER-A2-LDR-DP4     | GAGTACTGCAACCATTGCTATGGTGTGCGT          |
| ER-A2-LDR-UP5   | Blk- <u>CGCTCGCTTTGGCCTGCTGC</u><br>TTAATCCCGCAGTGTTACATGCATGTA  | ER-A2-LDR-DP5     | AGTGATTATTATAATCCGCCTCACAATGTTAATCTTAGC |
| ER-A2-LDR-UP6   | Blk- <u>CGCTGCGTGAGGGCTCGGAC</u><br>CGAGTTCGTACCGAGGGCACTTA      | ER-A2-LDR-DP6     | GGAGGCATAGAGGGATTACAACAAAAACTGTGT       |
| EZ-1-LDR-UP7    | Blk- <u>TTCCACCCGCGTCGTCCTGC</u><br>TTGAGAAGGTTCAAAGGCAAATTCAGTA | EZ-A1-LDR-DP7     | CATGCAGAGCAAGGACTGATACAATATCCAACA       |
| EZ-A1-LDR-UP8   | Blk- <u>GACCGCTCAGCAGACCGCCA</u><br>CAAGGGATGCACATGGTTGCC        | EZ-A1-LDR-DP8     | GGGCATGATGCCAACGAYGCTGT                 |

|                |                                                                             |                |                                                   |
|----------------|-----------------------------------------------------------------------------|----------------|---------------------------------------------------|
| EZ-A1-LDR-UP9  | Blk- <u>AGCACGCTTCCGGGACCCAC</u><br>GAGGTGAACCTCTTTAAGGCTGCACTC             | EZ-A1-LDR-DP9  | AGCTCCCTGGCCAAGCATGGAGAGTAT                       |
| EZ-A2-LDR-UP10 | Blk- <u>AGGCGGTGTTGGCTCGAGGC</u><br>TTGCATTTAGATATGAGTTTACAGCACCTTTTAT<br>A | EZ-A2-LDR-DP10 | GAATATTGCAACCGTTGCTATGGTGTTAAGAATGT               |
| EZ-A2-LDR-UP11 | Blk- <u>GCGTGTCTCCTGTCCGGCCA</u><br>CATTATACAATCCCACAGTGTATATGCATGTC        | EZ-A2-LDR-DP11 | AGTGATTATTATAATCCACCACATAACCTCACACTGGT            |
| EZ-A2-LDR-UP12 | Blk- <u>TTGGGCTCGTGAAGGCAGGC</u><br>GGGCTAGTTCATACAGGGGTCAATG               | EZ-A2-LDR-DP12 | GGAGGGATTGAAGGACTGCAACAAAACTCT                    |
| ES-A1-LDR-UP13 | Blk- <u>GAGGTCCCGCTTCGCCAC</u><br>GGAAAAAGTACAAAGGCAGATTCAGGTC              | ES-A1-LDR-DP13 | CATGCAGAACAAGGGCTCATTCAATATCCA                    |
| ES-A1-LDR-UP14 | Blk- <u>GGTGCCACGTGATCGCTCCG</u><br>AGGGGATGCACATGGTCGCA                    | EZ-A1-LDR-DP14 | GGCCATGATGCGAATGACACAGTAATATCTAATT                |
| ES-A1-LDR-UP15 | Blk- <u>TTGGAGCAGGTGCGTCGCGT</u><br>GAGGTCAGTTCATTCAAGGCAGCTCTT             | ESA1-LDR-DP15  | GGCTCACTTGCCAAGCATGGAGAATATGT                     |
| ES-A2-LDR-UP16 | Blk- <u>CTGCAGGCGCGTGAGGGAGG</u><br>CAGGTATGAATTCACAGCTCCCTTCATC            | ESA2-LDR-DP16  | AAATATTGCAACCAATGCTATGGGGTTCGT                    |
| ES-A2-LDR-UP17 | Blk- <u>GCCATCCGCGCTCAGTCCAC</u><br>CTAATTCCGCAATGTTACATGCATGTT             | ES-A2-LDR-DP17 | AGTGATTATTATAACCCACCACATAATGTAACCTTAGAGAAT<br>AGT |
| ES-A2-LDR-UP18 | Blk- <u>GGTGGGACGCGTCTGCCTCG</u><br>GGACCAAGTGCTTATAGAGGCCACCTT             | ES-A2-LDR-DP18 | GGCGGTATTGAGGGGCTTCAACAAAAGT                      |
| M-A1-LDR-UP19  | Blk- <u>CGTCTCCTGCAGTCTCGGCCA</u><br>CCAAATTAYGTGGGYGATTTAAACYTAGAT         | M-A1-LDR-DP19  | GAYCAGTTYAAAGGGAATGTCTGCCAYGC                     |
| M-A1-LDR-UP20  | Blk- <u>CTCGTCCGCAGTCGTCGCT</u><br>GCATGGCTGCCTCTTGGGATTAT                  | M-A1-LDR-DP20  | GAGCAATTTTGAATATCCTTTAGCTCATACTGTGGC              |

|                |                                                                      |                 |                                      |
|----------------|----------------------------------------------------------------------|-----------------|--------------------------------------|
| M-A1-LDR-UP21  | <u>Blk-TCGCTGGGTCTTCGCAGGC</u><br>AATCCCRGCACACCCACTCAGAAT           | M-A1-LDR-DP21   | GTTGCGTGAAGGAAATCAAGCTTTTATTCAGAA    |
| M-A2-LDR-UP22  | <u>Blk-CTGCCTCGGCGTCGCTGCTC</u><br>AATCTTGACCTTAATCCACAGCACGAT       | M-A2-LDR-DP22   | GGATAAAAGAACCCAGTGTGGGGGCTGT         |
| M-A2-LDR-UP23  | <u>Blk-TGGGACCCCTCGGACTCGC</u><br>AACTTTGTTTTCCAYATACCAAATACTGGAAT   | M-A2-LDR-DP23   | GACATTGTTGCATCATTTAAAGTCTAACTCGTTGTT |
| M-A2-LDR-UP24  | <u>Blk-TGGCTGCCGCTCGCTTTCC</u><br>ATTGATTCCTGGATTTAGATCYATTGTTTCATAT | M-A2-LDR-DP24   | GCTWTCAGAATGGYTGCTCCTRGAGGTC         |
| CC-A1-LDR-UP36 | <u>Blk-TCGCGACCGTCTGCTCAGGC</u><br>TCCAGATGGCTAGTGCCACYGATGAT        | CC-A1-LDR-DP36  | GCACAAAAGGATTCCATCTACGCATCTGC        |
| CC-A1-LDR-UP37 | <u>Blk-TCGCGACCGTCTGCTCAGGC</u><br>CCAGATGGCCAGTGCTACAGACGAT         | CC-A1-LDR-DP37  | GCACAAAAGGAYTCCATCTATGCWKCTGC        |
| CC-A1-LDR-UP38 | <u>Blk-TCGCGACCGTCTGCTCAGGC</u><br>AGATGGCYRGTGCAACCGATGAT           | CC-A1-LDR-DP38A | GCACAAAAGAYTCCATCTATGCATCTGC         |
|                |                                                                      | CC-A1-LDR-DP38B | GCACAGAAGGACTCTATATATGCATCTGC        |
| CC-A1-LDR-UP39 | <u>Blk-CGCTGGACCGCTAGGCACCC</u><br>AAATGCAGGAACCATTAAATCWTGGGAT      | CC-A1-LDR-DP39A | GARAGTTAYACTGAGCTGAAAGTTGARGTTCCCA   |
|                |                                                                      | CC-A1-LDR-DP39B | GAGAGTTATACCGAGTTGAAGGTTGAAGTTCCCA   |
| CC-A1-LDR-UP40 | <u>Blk-CGCTGGACCGCTAGGCACCC</u><br>AAATGCAGGAACCTATCAAGTCTTGGGAT     | CC-A1-LDR-DP40  | GAGAGCTACACTGAACTTAAGGTTGGTGTCCCC    |
| CC-A1-LDR-UP41 | <u>Blk-CGCTGGACCGCTAGGCACCC</u><br>AAAYACAGGAACCATTAAAGTCTTGGGAT     | CC-A1-LDR-DP41  | GAGAGCTAYACTGAGCTGAAAGTGGATGTGC      |

|                 |                                                                    |                 |                                   |
|-----------------|--------------------------------------------------------------------|-----------------|-----------------------------------|
| CC-A1-LDR-UP42  | Blk- <u>CGCTGGACCGCTAGGCACCC</u><br>GGTTTGAAAAGAACACGAGCACTATCAAAT | CC-A1-LDR-DP42  | CCTGGGACGAGAGCTACACTGAGCTGAAGT    |
| CC-A1-LDR-UP43  | Blk- <u>TTGGGCGTTGGTGCGTCCTG</u><br>GAGGAAAGACATAGGCTTCCGTGTCAAT   | CC-A1-LDR-DP43  | GCAAACACRGCAGCTTTRAGYAACAAGGT     |
| CC-A1-LDR-UP44  | Blk- <u>TTGGGCGTTGGTGCGTCCTG</u><br>GAGGAAGGAYATWGGYTTCCGTGTCAAT   | CC-A1-LDR-DP44A | GCAAATACGGCAACCCTGAGCCATAAAGT     |
|                 |                                                                    | CC-A1-LDR-DP44B | GCTAATACGGCAGCCTTGAGCAACAAAGT     |
| CC-A1-LDR-UP45  | Blk- <u>TTGGGCGTTGGTGCGTCCTG</u><br>GAGGAAGGACATAGGCTTCCGCGTAAAT   | CC-A1-LDR-DP45  | GCAAACACAGCGGCCCTAAGCAACAAAGT     |
| CC-A1-LDR-UP46  | Blk- <u>TTGGGCGTTGGTGCGTCCTG</u><br>GAGAAAGGACATAGGTTTCCGCATCAAT   | CC-A1-LDR-DP46  | GCTAACACAACAGCGCTGAGCAACAAAGT     |
| CC-A2-LDR-UP47  | Blk- <u>GCTCCAGTTCGGGTGCGCT</u><br>TGAAGAAGGCACTYYTGAGCACHCCAAT    | CC-A2-LDR-DP47A | GAAGTGGGGGAAGAAGCTTTATGAGCTYTTY   |
|                 |                                                                    | CC-A2-LDR-DP47B | GAARTGGGGAAAGAAGCTTTATGAGCTYTTYGT |
| CC-A2-LDR-UP48  | Blk- <u>GCTCCAGTTCGGGTGCGCT</u><br>TGAAGAAAGCTCTGCTCAGCACTCCCAT    | CC-A2-LDR-DP48  | GAAGTGGGGRAAGAARCTTTATGARCTCTTTGT |
| CC-A2-LDR-UP49  | Blk- <u>GCTCGAGGCAGTCCACGCGT</u><br>GTGCTRACAGCYGGCAGAATCAGTGARAT  | CC-A2-LDR-DP49  | GGGWTCTGCTTTGGRACAATCCCTGTGT      |
| CC-A2-LDR-UP50A | Blk- <u>GCTCGAGGCAGTCCACGCGT</u><br>GTGTTAACAGCCGGCAGAATCAGTGAGAT  | CC-A2-LDR-DP50  | GGGTGTYTGCTTYGGAACCATCCCT         |
| CC-A2-LDR-UP50B | Blk- <u>GCTCGAGGCAGTCCACGCGT</u><br>GTGCTGACAGCTGGCAGAATTAGTGAGAT  |                 |                                   |
| CC-A2-LDR-UP51  | Blk- <u>GCTCGAGGCAGTCCACGCGT</u><br>GTGCTGACAGCTGGTAGGATCAGCGAAAT  | CC-A2-LDR-DP51  | GGGTGTCTGCTTTGGGACAATTCCCT        |

|                  |                                                                              |                  |                                     |
|------------------|------------------------------------------------------------------------------|------------------|-------------------------------------|
| CC-A2-LDR-UP52   | Blk- <u>GCGTGAGGTTGGGAGGGCGT</u><br>CAGGRTTCAACATACAGGACATGGAYATT            | CC-A2-LDR-DP52   | GTDCCTCTGAGCACCTRCTGCACCA           |
| CC-A2-LDR-UP53A  | Blk- <u>GCGTGAGGTTGGGAGGGCGT</u><br>CAGAAAAAAGGATTTGTAATAAAAGATATGGA<br>CATT | CC-A2-LDR-DP53   | GTGGCCTCTGARCATCTGCTRCAYCA          |
| CC-A2-LDR-UP53B  | Blk- <u>GCGTGAGGTTGGGAGGGCGT</u><br>GGGCTTTGACATAAAGGACATGGACATC             |                  |                                     |
| RVF-A1-LDR-UP54  | Blk- <u>TTGGTTGGGAGGCTGCGGTG</u><br>ATGGCCARCTCAGCACTGCACAT                  | RVF-A1-LDR-DP54  | GAGGTTGTGCCCTTTGCAGTGTTAAGA         |
| RVF-A1-LDR-UP55  | Blk- <u>CGTCGACCTTCGCCAACCC</u><br>GGAMGCAGATTTTGTCTGCTTAT                   | RVF-A1-LDR-DP55A | GAATGCACTGCTCAGTATGCCAATGCC         |
|                  |                                                                              | RVF-A1-LDR-DP55B | GAGTGYACTGCTCARTAYGCCAATGCC         |
| RVF-A1-LDR-UP56  | Blk- <u>CGTCGCTCTGGTTCGCTCGC</u><br>GGTCTGGAAKAARCCTTTATGTGTAGGGTAT          | RVF-A1-LDR-DP56  | GAGAGAGTRGTTGTGAAGAGAGAACTCKCTGCTCY |
| RVF-A2-LDR-UP57A | Blk- <u>GGTGACCCGTGACGCTGCCA</u><br>CRAGTCGGACTKGGAGACTTTGCAT                | RVF-A2-LDR-DP57  | CAAAYGTKGCACCTCCACCAGCRAAGT         |
| RVF-A2-LDR-UP57B | Blk- <u>GGTGACCCGTGACGCTGCCA</u><br>GAGTCSGGCTKGGAGACTTTGCAT                 |                  |                                     |
| RVF-A2-LDR-UP58A | Blk- <u>AGGCTTGGCGCTCGTCACCC</u><br>GTTCCCAATCTAAAAGAAGCCATAT                | RVF-A2-LDR-DP58A | CCTGGCCTCTTRGAGARCCCTCMCT           |
| RVF-A2-LDR-UP58B | Blk- <u>AGGCTTGGCGCTCGTCACCC</u><br>GTTCCCAACTCAAAAAGAAGCCATAT               | RVF-A2-LDR-DP58B | CCTGGCCTCTTGAGAACCYTMMTT            |

|                 |                                                                             |                  |                                                 |
|-----------------|-----------------------------------------------------------------------------|------------------|-------------------------------------------------|
|                 |                                                                             | RVF-A2-LDR-DP58C | CCTGGCCTCTGGWGAACCCTCWY                         |
| RVF-A2-LDR-UP59 | Blk- <u>GTCTCCACCGCTGCCATCGC</u><br>GCAATGAGGAGYTGCAAGATYRCCAAT             | RVF-A2-LDR-DP59A | GATCTWGAGGACTCCTTTGYTGGCTTACACAGT               |
|                 |                                                                             | RVF-A2-LDR-DP59B | GATYTAGAAGACTCCTTTGTTGGCYTRCACAGT               |
| VAC-A1-LDR-UP60 | Blk- <u>CGTCGTGAGCCATCGCCTGC</u><br>CTAAAAGAATTRGGTTCTTTCGATTTGGAA          | VAC-A1-LDR-DP60  | AACGTCAACGTGTATCCTGGAGTATGGAATACATAC            |
| VAC-A1-LDR-UP61 | Blk- <u>GCCATCGCCACAGCAGGAC</u><br>GCCATGTAAACACCTATGGAGAAGGG               | VAC-A1-LDR-DP61  | TTCGATTATCTGTATCAGCCTTGTGATCTTCTCGT             |
| VAC-A2-LDR-UP62 | Blk- <u>AGCAAGGCGACCGGACGACC</u><br>ATTGAACGGTATCTTCTTAATCTCTGGTTCTAG       | VAC-A2-LDR-DP62  | TTCCGCATTAATGATGAACTAAGTCACTATTTTAA             |
| VAC-A2-LDR-UP63 | Blk- <u>GGACGAGGAGGCCGCTTGGT</u><br>TACATCACCTCTAACATCATCATTACCAGA          | VAC-A2-LDR-DP63  | ATACTGATCTTCTTTTGTGCGTAAATACATGTCTAATGTGTT      |
| VAC-A2-LDR-UP64 | Blk- <u>CCTGGCCAGACCTCCGCGT</u><br>GAAGGATAAACTCGTACTAATCTCTTCTTAAAC<br>AGC | VAC-A2-LDR-DP64  | CTGTTCAAATTTATATCCTATATACGAAAAAATAGCAACCAG<br>T |
| VAR-A1-LDR-UP65 | Blk- <u>CCTGCTCGTCGCTCCGTTGG</u><br>AAGATTCTATCTCTGATTATACAGGTTATGAC<br>GAT | VAR-A1-LDR-DP65  | TTCAATCAAACAAAAAGCTCAATAAGATGACTGTAGAA          |
| VAR-A1-LDR-UP66 | Blk- <u>GTGATCGCCGTCCGTGCCG</u><br>TATCGAGGCCGCTCGTGGATACTTA                | VAR-A1-LDR-DP66  | TGCGAAGCCATGTAAACACCTATGGAGAAGT                 |

|                 |                                                                               |                 |                                                     |
|-----------------|-------------------------------------------------------------------------------|-----------------|-----------------------------------------------------|
| VAR-A2-LDR-UP67 | Blk- <u>TTCCGAGGCCTGACCCGACC</u><br>ATAGATTTTTTCATATTGAAYGGTATCTTCTTGAT<br>T  | VAR-A2-LDR-DP67 | TCTGGTTCTAATTCCGCATTAATGATGAAACTAAGT                |
| VAR-A2-LDR-UP68 | Blk- <u>GGTGTGGTCTCGCGCTTCCG</u><br>ATACGTCATTTTCATCTGTAGTATTCTTGTCATTR<br>AG | VAR-A2-LDR-DP68 | TGATAAACTTGTGCTAATCTCTTCTTTAACAGTCTGTTCA            |
| VAR-A2-LDR-UP69 | Blk- <u>TCCGTTCCGCCAGAGGGTGA</u><br>CGAAAAAATAGCAACCAATGTTTGATCATT            | VAR-A2-LDR-DP69 | CGCGTCAATATTCTGTTCTATTGTARTGTATAACAATCTTATA<br>TCTT |
| L-A1-LDR-UP70   | Blk- <u>TCGCCGTCCGCTGTCTTTGG</u><br>ATTTGCCTCATRAAATTGTCAAYAGCAT              | L-A1-LDR-DP70   | CACTAGTRCTCACWACTCTTTCTTCMACCATGGT                  |
| L-A1-LDR-UP71   | Blk- <u>TCGCCGTCCGCTGTCTTTGG</u><br>ATTTGCCKCATGAARTTGCAACWGCAT               | L-A1-LDR-DP71   | CACTAGTRCTCACCACCCTTCTTCCACCATAGT                   |
| L-A1-LDR-UP72   | Blk- <u>GACCAGGCCTCGACCCACCC</u><br>CACAGTTAACATCCAACGCTACACAGAGAT            | L-A1-LDR-DP72   | CYAGAAAYTTTATTCTRGGTGACCACTTCATTTTGT                |
| L-A1-LDR-UP73A  | Blk- <u>GACCAGGCCTCGACCCACCC</u><br>CACAACCTGACATCTAGTGCCACACAAAGAT           | L-A1-LDR-DP73   | CYAGRAATTTTATCCTGGGTGACCACTTCAT                     |
| L-A1-LDR-UP73B  | Blk- <u>GACCAGGCCTCGACCCACCC</u><br>CACAATTCACATCCAGTGCCACACAGAGT             |                 |                                                     |
| L-A1-LDR-UP74   | Blk- <u>GCCACGCTGCCAGGACTCCG</u><br>CCAACCCTATCCTCCAATAGYTTTGAT               | L-A1-LDR-DP74   | GCAGTTGGCTTYAAGGGAAAATARTCACAAGGT                   |
| L-A1-LDR-UP75   | Blk- <u>GCCACGCTGCCAGGACTCCG</u><br>CCRATCCTGTCTCCAGCAATTTAGAT                | L-A1-LDR-DP75   | GCWGTGGCTTTAGAGGGAARTAATCACAAGGT                    |
| L-A1-LDR-UP76   | Blk- <u>GCCACGCTGCCAGGACTCCG</u><br>CCCCTCTATCTTCAAGTAATTTTGAT                | L-A1-LDR-DP76   | GCGGTGGCTTCAAAGGGAAATAATCACAAGGT                    |

|                  |                                                                            |                  |                                             |
|------------------|----------------------------------------------------------------------------|------------------|---------------------------------------------|
| L-A2-LDR-UP77    | Blk- <u>TCCGGTCTTGGTCGCTTCGC</u><br>GCAATRGARCTCTGAAATGCAGATTT             | L-A1-LDR-DP77A   | GTTGATAGCTTCAGACAGCAATTTTTCGCGC             |
|                  |                                                                            | L-A1-LDR-DP77B   | GTTGATRGCYTCAGARTATAATTTCTGTGC              |
|                  |                                                                            | L-A1-LDR-DP77C   | GTTTATGGCTTCTGATAGCAGTTTCTGTGC              |
| L-A2-LDR-UP78    | Blk- <u>GTCTTCGCGGTGGGTGCCTG</u><br>TTCTCRICATCTAGGTTACAGCACCT             | L-A1-LDR-DP78A   | GAATATATTATTTTTTGCCTTAAAACCATTCTCAGAGGATGT  |
|                  |                                                                            | L-A1-LDR-DP78B   | GAATATATTATCTTTTGYCTCAACACCATYCTTAARGGATGT  |
| L-A2-LDR-UP79    | Blk- <u>GTCTTCGCGGTGGGTGCCTG</u><br>TTCATCATCAAGGTTTACGGCACCT              | L-A2-LDR-DP79    | GAGTATATAACCTTCTGTCTCAAAAACCATTCTTAGAGGGTGT |
| L-A2-LDR-UP80A   | Blk- <u>GCGTTTGGTTGGCTGCGGAC</u><br>CGGTTRCCRTCTACCCAGTCTCTAACAT           | L-A2-LDR-DP80    | CTGTCTCGCARTTCAAWARGAATGGGTCAAT             |
| L-A2-LDR-UP80B   | Blk- <u>GCGTTTGGTTGGCTGCGGAC</u><br>TTGCCATCTACCCAATCTCTGACAT              |                  |                                             |
| L-A2-LDR-UP81    | Blk- <u>GCGTTTGGTTGGCTGCGGAC</u><br>CGGTTGCCGTCCACCCAGTCTTTTACAT           | L-A2-LDR-DP81    | CTGTTTCACAGTTCAGAAGGAATGGGTCAAT             |
| DEN-A1-LDR-UP82A | Blk- <u>GCTCACCCGGACGCCACTGC</u><br>GTGTTYAAAGAGAAAGTTGACACRCGCACRC        | DEN-A1-LDR-DP82A | CAARAGCRAAACGRGGCACAGCACA                   |
| DEN-A1-LDR-UP82B | Blk- <u>GCTCACCCGGACGCCACTGC</u><br>CGCGTTTTCAAAGARAAAGTRGACACGAGAACY<br>C | DEN-A1-LDR-DP82B | AAGAACCGAARGAAGGCACRAAGAAACTRAT             |
| DEN-A1-LDR-UP82C | Blk- <u>GCTCACCCGGACGCCACTGC</u><br>TYTTYAAAGAGAAAAGTGGACACCAGGACRC        | DEN-A1-LDR-DP82C | CCAGGTCCATGCCAGGAACAAGAAGGGT                |
| DEN-A1-LDR-UP82D | Blk- <u>GCTCACCCGGACGCCACTGC</u><br>GTGTTCAARGAGAAGGTGGAYACCAGAACWC        | DEN-A1-LDR-DP82D | CTARRCCCATGCCAGGRACAAGAAAGGT                |



|                  |                                                                            |                  |                                       |
|------------------|----------------------------------------------------------------------------|------------------|---------------------------------------|
|                  |                                                                            | DEN-A1-LDR-DP82E | CACARCCAAAACCCGGYACACGART             |
|                  |                                                                            | DEN-A1-LDR-DP82F | CACAGCCMAAACYAGGCACACGAGT             |
| DEN-A1-LDR-UP83A | <u>Blk-TCCGCTGCCCACTTCCCTCG</u><br>GCCATYGGAGCAGTGGTTGTTGAYG               | DEN-A1-LDR-DP83A | AAAAYCAATGGAAGCTCAGCAAAAGARGCAGT      |
| DEN-A1-LDR-UP83B | <u>Blk-TCCGCTGCCCACTTCCCTCG</u><br>GCWATWGGAGCAGTGGTTGTTGATG               | DEN-A1-LDR-DP83B | AGAACAARTGGAARTCGGCWCGTGAGGC          |
| DEN-A1-LDR-UP83C | <u>Blk-TCCGCTGCCCACTTCCCTCG</u><br>GCAAYGCAGCYTTGGNGCCATATTCAGTATG         | DEN-A1-LDR-DP83C | AGAACCAATGGGAYAGYGGARAGCTGCT          |
| DEN-A1-LDR-UP83D | <u>Blk-TCCGCTGCCCACTTCCCTCG</u><br>GCYATGGGAGCYGTTTTACAGAGG                | DEN-A1-LDR-DP83D | AGAACCAATGGGACAGTGCYARAGCTGTCYGT      |
| DEN-A1-LDR-UP83E | <u>Blk-TCCGCTGCCCACTTCCCTCG</u><br>GCTATGGGCGCYGHTTYACAGAG                 | DEN-A1-LDR-DP83E | AACAGGGATGGRCATCAGCCAGTGAAGC          |
| DEN-A1-LDR-UP83F | <u>Blk-TCCGCTGCCCACTTCCCTCG</u><br>CAGCCATAGGCGCRGTCTTYCAGGARG             |                  |                                       |
| DEN-A1-LDR-UP84A | <u>Blk-GTCTGCCACTGCGCTCGCCA</u><br>GAGAGGGAGCTTCAYAAACAGGGAAARTGYG         | DEN-A1-LDR-DP84A | CYACRTGTGTYTACAACATGATGGGGAAGAGA      |
| DEN-A1-LDR-UP84B | <u>Blk-GTCTGCCACTGCGCTCGCCA</u><br>CARGGAAAGRAATCTYCATCTTGAAGGAAAGTG<br>TG | DEN-A1-LDR-DP84B | ARACATGTGTGTACAACATGATGGGAAARAGAGARAA |
| DEN-A1-LDR-UP84C | <u>Blk-GTCTGCCACTGCGCTCGCCA</u><br>CGTGAAGCTCCATAAAAYTGGGCAARTGYG          | DEN-A1-LDR-DP84C | GAAGCTGYGTYTAYAACATGATGGGCAAGAGA      |
| DEN-A1-LDR-UP84D | <u>Blk-GTCTGCCACTGCGCTCGCCA</u><br>AAGGAAAGRAAYCTNCATCTTGAAGGAAATG<br>TG   | DEN-A1-LDR-DP84D | AATCRTGYGTCTAYAACATGATGGGAAAACGT      |

|                  |                                                                          |                  |                                     |
|------------------|--------------------------------------------------------------------------|------------------|-------------------------------------|
| DEN-A2-LDR-UP85A | <u>Bik-CGCTTCCCTGCAGGCCTCG</u><br>AACATGCYCTAYTGGCTATGGCAATYTTTA         | DEN-A1-LDR-DP85A | ARCTAACATACCAAAAYAARGTGGTAAGGGT     |
| DEN-A2-LDR-UP85B | <u>Bik-CGCTTCCCTGCAGGCCTCG</u><br>AACATGCYCTAYTGGCCACGGCAATCTTA          | DEN-A1-LDR-DP85B | AGYTRACCTACCAAAATAARGTGGTAAGGGT     |
| DEN-A2-LDR-UP85C | <u>Bik-CGCTTCCCTGCAGGCCTCG</u><br>ACACAAGAAAYTWGCGYAGGCCATTTTCA          | DEN-A1-LDR-DP85C | AGYTAACMTACCAAAAYAAGGTGGTAAGGGT     |
| DEN-A2-LDR-UP85D | <u>Bik-CGCTTCCCTGCAGGCCTCG</u><br>ACACAAGAAACTAGCCGAGGCCATWTTYA          | DEN-A1-LDR-DP85D | RAYTAACGTAYCAAAACAAGGTGGTGCCTGT     |
| DEN-A2-LDR-UP85E | <u>Bik-CGCTTCCCTGCAGGCCTCG</u><br>ACACAAGAAATTGGCCGAGGCTATTTTCA          | DEN-A1-LDR-DP85E | AGCTCACRTACCARAAYAAAGTGGTCAAAGTTCAA |
| DEN-A2-LDR-UP85F | <u>Bik-CGCTTCCCTGCAGGCCTCG</u><br>CCTGAACACAGGCAGYTAGCRAACGCTATATTY<br>A | DEN-A1-LDR-DP85F | AACTGACTTACCAAAATAAAGTGGT           |
| DEN-A2-LDR-UP85G | <u>Bik-CGCTTCCCTGCAGGCCTCG</u><br>CCTGAACACAGACARTTAGCGAACGCYATATTY<br>A | DEN-A1-LDR-DP85G | AAAYTAACYTATCAAAACAAAGTGGT          |
| DEN-A2-LDR-UP85H | <u>Bik-CGCTTCCCTGCAGGCCTCG</u><br>CCYCACCACAAGAYCCTAGCCAAAGCCATYTTC<br>A |                  |                                     |
| DEN-A2-LDR-UP85I | <u>Bik-CGCTTCCCTGCAGGCCTCG</u><br>CCTCATCATAARATCYTAGCYAAAGCCATTTTC<br>A |                  |                                     |
| DEN-A2-LDR-UP86A | <u>Bik-GCTCTCGACCCGGACCTCG</u><br>GTGCARAGACCAGCAAAAAAYGGAACYGT          | DEN-A1-LDR-DP86A | GATGGATGTYATATCCAGRCGTGACCARAGA     |

|                  |                                                                           |                  |                                     |
|------------------|---------------------------------------------------------------------------|------------------|-------------------------------------|
| DEN-A2-LDR-UP86B | <u>Blk-GCTCTCGCACCCGGACCTCG</u><br>CGTGTRCAAAGACCAACACCAAGAGGMACAGT       | DEN-A1-LDR-DP86B | AATGGAYATYATATCGAGAAGAGACCAAAGAGGYA |
| DEN-A2-LDR-UP86C | <u>Blk-GCTCTCGCACCCGGACCTCG</u><br>TCAACGACCRACCTCCAAMRGGCACGGT           | DEN-A1-LDR-DP86C | RATGGACATCATATCGAGAARAGACCAAAGAGGCA |
| DEN-A2-LDR-UP86D | <u>Blk-GCTCTCGCACCCGGACCTCG</u><br>TYCTCAGACCCACACCGARAGGAGCRGT           | DEN-A1-LDR-DP86D | RATGGACATYATATCTAGRAAAGACCAAAGAGGCA |
|                  |                                                                           | DEN-A1-LDR-DP86E | AATGGAYATTATATCTAGGAAAGACCAAAGGGGCA |
|                  |                                                                           | DEN-A1-LDR-DP86F | VATGGAYATYATATCCAGGAAAGACCAAAGAGGTA |
| DEN-A2-LDR-UP87A | <u>Blk-CTGCCCTGCGTCGCTCCCAC</u><br>GARGCCCAACTRATAAGACARATGGAGTCTGAG<br>G | DEN-A1-LDR-DP87A | GAATYTTTTYACCCAGCGAATTRGAGACCC      |
| DEN-A2-LDR-UP87B | <u>Blk-CTGCCCTGCGTCGCTCCCAC</u><br>GAGGYCCAATAATAAGACAAATGGAGTCTGA<br>RG  | DEN-A1-LDR-DP87B | GAGTCTTYAAAARCATCCAGCACCTGACAGYC    |
| DEN-A2-LDR-UP87C | <u>Blk-CTGCCCTGCGTCGCTCCCAC</u><br>GCCCAAYTAATYAGACAGATGGAAGGAGAAG        | DEN-A1-LDR-DP87C | GAATYTTYAAAAGCATTCAGCRCCTGACAGTC    |
| DEN-A2-LDR-UP87D | <u>Blk-CTGCCCTGCGTCGCTCCCAC</u><br>CAACTRATTAGGCAGATGGAGGGGGAAG           | DEN-A1-LDR-DP87D | GYGTGTTGTCTRAAGRCAGACCTCGAGAACCTT   |
| DEN-A2-LDR-UP87E | <u>Blk-CTGCCCTGCGTCGCTCCCAC</u><br>GCCCAGTTRRTCAGACARATGGAAGGAGAAG        | DEN-A1-LDR-DP87E | GTGTGCTGWCAAAGGCAGACCTCGAGAA        |
| DEN-A2-LDR-UP87F | <u>Blk-CTGCCCTGCGTCGCTCCCAC</u><br>CTYATCCGCCARATGGAAGCTGARG              | DEN-A1-LDR-DP87F | GAGTYATCACACRAGAYGACATGCAGAACCCAA   |
| YF-A1-LDR-UP88A  | <u>Blk-GTGAAGGCCGTCGGACCGCT</u><br>CAAGGATCCACCMGCRGGAACYAGAAAGTTG        | YF-A1-LDR-DP88A  | TCAAYARGTGGCTSTTCCGCCACCT           |

|                 |                                                                           |                 |                                 |
|-----------------|---------------------------------------------------------------------------|-----------------|---------------------------------|
| YF-A1-LDR-UP88B | <u>Bik-GTGAAGCCGTCGGACCGCT</u><br>TCCTGCTGGAACHAGGAARATCATGARGGTGG        | YF-A1-LDR-DP88B | TAAACCGWTGGTTGTTTCGACAYCTRGC    |
|                 |                                                                           | YF-A1-LDR-DP88C | TGAATAGATGGTTGTTTCGGCATCTGTC    |
| YF-A1-LDR-UP89A | <u>Bik-CGCTCTCGCTGCCTCGGGAC</u><br>GTGYACAAAGGAAGAATTYATTGCAAARGTCC       | YF-A1-LDR-DP89A | GCAGTCATGCTGCGRTAGGRGGCCT       |
| YF-A1-LDR-UP89B | <u>Bik-CGCTCTCGCTGCCTCGGGAC</u><br>GCACAAAGGARGARTTCATAGCCAAGGTGC         | YF-A1-LDR-DP89B | GGAGCCATGCCGCAGTGGGGGC          |
| YF-A1-LDR-UP89C | <u>Bik-CGCTCTCGCTGCCTCGGGAC</u><br>GCACCAAAGAAGAGTTCATTGCCAAAGTGC         | YF-A1-LDR-DP89C | GMAGYCAYGACGCCATTGGAGCTTACCT    |
| YF-A1-LDR-UP90A | <u>Bik-AGGCCGCTGACCGTACTGC</u><br>AAGACAGCCAATGAAGCRGTYCAAGACCC           | YF-A1-LDR-DP90A | YAAGTTTTGGGAGATGGTTGAYGCTGAGC   |
| YF-A1-LDR-UP90B | <u>Bik-AGGCCGCTGACCGTACTGC</u><br>CGGCCAATGAGGCAGTCCAGGATCC               | YF-A1-LDR-DP90B | AAAGTTTTGGGAGATGGTCGATGCAGAAC   |
| YF-A1-LDR-UP90C | <u>Bik-AGGCCGCTGACCGTACTGC</u><br>TGCCAAYGAGGCYGTCCARGACCC                | YF-A1-LDR-DP90C | RAAGTTYTGGGAAYTGGTGGATGAAGAAAG  |
| YF-A2-LDR-UP91A | <u>Bik-ACCCTCCGTCCGTTGGCGTC</u><br>GACCTRGAYGATGARCAGGAGATCATGAGCT        | YF-A2-LDR-DP91A | ACATGAACGCTGAGCAGAGGAAACTGGC    |
| YF-A2-LDR-UP91B | <u>Bik-ACCCTCCGTCCGTTGGCGTC</u><br>GACCTGGATGACGAGCAAGAGATCATGAGTT        | YF-A2-LDR-DP91B | ACATGAGCCCTGAACAAAAGGAAGCTGGC   |
| YF-A2-LDR-UP91C | <u>Bik-ACCCTCCGTCCGTTGGCGTC</u><br>GCAGACCTTGATGATGAACAGGARATCYTGAAY<br>T | YF-A2-LDR-DP91C | ACATGAGCYCACATCACAAAAAACTGGCACA |
| YF-A2-LDR-UP92A | <u>Bik-GGTGTCCGGGTGTCGCGTGA</u><br>CCTYCGACCAGCACCAGGWGGCAA               | YF-A2-LDR-DP92A | GGCYTTCATGGACATCATCAGYMGGAGAGA  |

|                 |                                                                            |                 |                                   |
|-----------------|----------------------------------------------------------------------------|-----------------|-----------------------------------|
| YF-A2-LDR-UP92B | <u>Blk-GGTGTCCGGGTGTCGCGTGA</u><br>TGAGGCCAGCCCCAGGAGGCAA                  | YF-A2-LDR-DP92B | AGCCTACATGGATGTCATAAGYCGRCGAGAYCA |
| YF-A2-LDR-UP92C | <u>Blk-GGTGTCCGGGTGTCGCGTGA</u><br>GTGCTGAGACCARCMCCAGGMGGGAA              |                 |                                   |
| YF-A2-LDR-UP93A | <u>Blk-CCTGGCTCGCTCTCCGCTCG</u><br>CACYATCACCAATYTGAAAGTYCAGCTCATAAG<br>GA | YF-A2-LDR-DP93A | TGGCTGAAGCTGAGATGGTAATCAACCATC    |
| YF-A2-LDR-UP93B | <u>Blk-CCTGGCTCGCTCTCCGCTCG</u><br>CACCATAACCAATCTAAAAGTCCAGCTCATAAG<br>AA | YF-A2-LDR-DP93B | TGGCTGAAGCTGAAATGGTGATTAACCATC    |
| YF-A2-LDR-UP93C | <u>Blk-CCTGGCTCGCTCTCCGCTCG</u><br>CACYATCACCAACYTGAAAGTCCAATTGATCA        | YF-A2-LDR-DP93C | GRATGGCAGAAGCAGAGAWKGTGATACATCA   |
